# Supplementary material for: Fabrication of a visible light detector based on a coaxial polypyrrole/TiO2 nanorod heterojunction
Source: Royal Society of Chemistry journal article supplement (doi:10.1039/c4ra07886a), 2014-01-01
Supplement: c4ra07886a1.pdf [file c4ra07886a1.pdf]

## Supporting Information

### **Fabrication of Visible Light Detector Based on Coaxial Polypyrrole/TiO<sub>2</sub> Nanorods Heterojunction**

Wenji Zheng<sup>a</sup>, Xiangcun Li<sup>a</sup>, Chunxu Dong<sup>b</sup>, Xiaoming Yan<sup>a</sup>, and Gaohong He<sup>a,\*</sup>

<sup>a</sup> State Key Laboratory of Fine Chemicals, R&D Center of Membrane Science and Technology, Dalian University of Technology, Dalian, 116024, China

<sup>b</sup> College of Chemistry and Chemical engineering, Lanzhou University, Lanzhou, 730000, China

Corresponding author:

Gaohong He, State Key Laboratory of Fine Chemicals, 2 Linggong Road, Dalian, Liaoning Province, 116024 P.R. China, Tel: +86 411 84986291 Fax: +86 411 84986291 E-mail: hgaohong@dlut.edu.cn

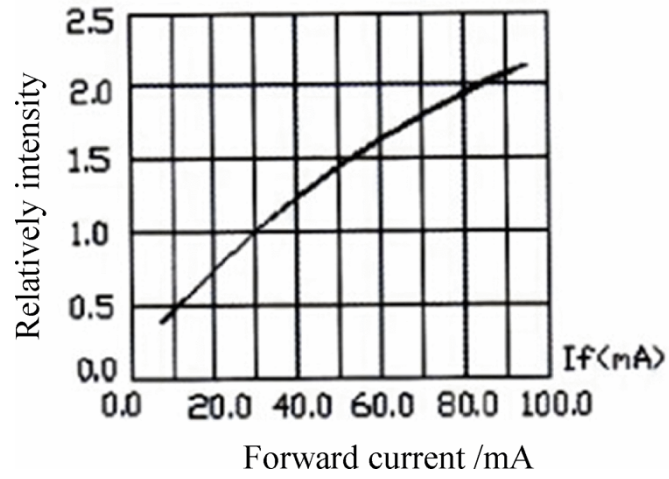

Fig. S1 Relative luminous intensity vs. forward current

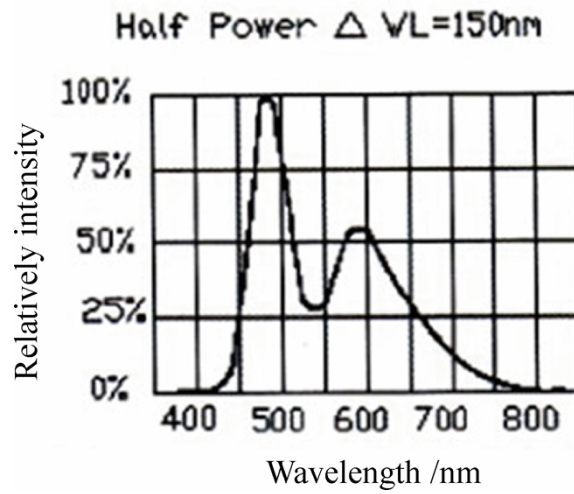

Fig. S2 Relative luminous intensity vs. wavelength

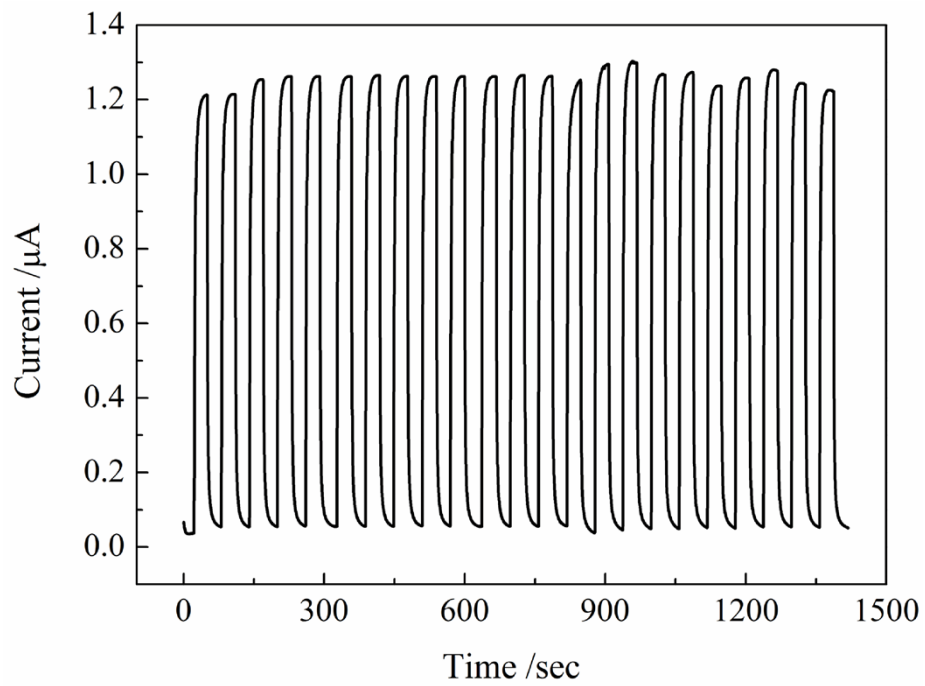

Fig. S3 Time-resolved responsive curve of the composite PPy/TiO<sub>2</sub> NRs-12h at 1.0V bias and light intensity of 2.86  $\mu\text{W}/\text{cm}^2$
